# Supplementary material for: Gas-phase synthesis and deposition of metal–bipyridine complex [M–bpy1–2]+ (M = Ag, Cu)
Source: Royal Society of Chemistry journal article supplement (doi:10.1039/d1cp02399c), 2021-01-01
Supplement: d1cp02399c1.pdf [file d1cp02399c1.pdf]

***Supporting Information for***

**Gas-Phase Synthesis and Deposition of Metal-bipyridine Complex**

**[M-bpy<sub>1-2</sub>]<sup>+</sup> (M=Ag, Cu)**

*Mengdi Guo,<sup>ab</sup> Benben Huang,<sup>ab</sup> Qiu hao Yi,<sup>ab</sup> and Zhixun Luo<sup>\*a</sup>*

a. Beijing National Laboratory for Molecular Sciences (BNLMS), State Key Laboratory for Structural Chemistry of Unstable and Stable Species, Institute of Chemistry, Chinese Academy of Sciences, Beijing 100190, China

b. University of Chinese Academy of Sciences, Beijing 100049, China

\*Correspondence. Email: [zxluo@iccas.ac.cn](mailto:zxluo@iccas.ac.cn)

# Contents:

|                                               |   |
|-----------------------------------------------|---|
| <b>S1. Thermodynamics</b> .....               | 1 |
| <b>S2. Charge distribution analysis</b> ..... | 2 |
| <b>S3. Topological analysis</b> .....         | 2 |

## S1. Thermodynamics

Table S1. DFT-calculated Energetics

|                 |   |                                        |               |                                                                |                                     |
|-----------------|---|----------------------------------------|---------------|----------------------------------------------------------------|-------------------------------------|
| $\text{Ag}^+$   | + | $\text{C}_{10}\text{H}_8\text{N}_2^0$  | $\rightarrow$ | $[\text{Ag-C}_{10}\text{H}_8\text{N}_2]^+$                     | $\Delta E = -3.062 \text{ eV}$ (1)  |
| $\text{Ag}_2^+$ | + | $\text{C}_{10}\text{H}_8\text{N}_2^0$  | $\rightarrow$ | $[\text{Ag-C}_{10}\text{H}_8\text{N}_2]^+ + \text{Ag}^0$       | $\Delta E = -1.238 \text{ eV}$ (2)  |
| $\text{Ag}_3^+$ | + | $\text{C}_{10}\text{H}_8\text{N}_2^0$  | $\rightarrow$ | $[\text{Ag-C}_{10}\text{H}_8\text{N}_2]^+ + \text{Ag}_2^0$     | $\Delta E = -0.060 \text{ eV}$ (3)  |
| $\text{Ag}^+$   | + | $2\text{C}_{10}\text{H}_8\text{N}_2^0$ | $\rightarrow$ | $[\text{Ag-(C}_{10}\text{H}_8\text{N}_2)_2]^+$                 | $\Delta E = -5.074 \text{ eV}$ (4)  |
| $\text{Ag}_2^+$ | + | $2\text{C}_{10}\text{H}_8\text{N}_2^0$ | $\rightarrow$ | $[\text{Ag-(C}_{10}\text{H}_8\text{N}_2)_2]^+ + \text{Ag}^0$   | $\Delta E = -3.250 \text{ eV}$ (5)  |
| $\text{Ag}_3^+$ | + | $2\text{C}_{10}\text{H}_8\text{N}_2^0$ | $\rightarrow$ | $[\text{Ag-(C}_{10}\text{H}_8\text{N}_2)_2]^+ + \text{Ag}_2^0$ | $\Delta E = -2.072 \text{ eV}$ (6)  |
| $\text{Cu}^+$   | + | $\text{C}_{10}\text{H}_8\text{N}_2^0$  | $\rightarrow$ | $[\text{Cu-C}_{10}\text{H}_8\text{N}_2]^+$                     | $\Delta E = -2.733 \text{ eV}$ (7)  |
| $\text{Cu}_2^+$ | + | $\text{C}_{10}\text{H}_8\text{N}_2^0$  | $\rightarrow$ | $[\text{Cu-C}_{10}\text{H}_8\text{N}_2]^+ + \text{Cu}^0$       | $\Delta E = -0.441 \text{ eV}$ (8)  |
| $\text{Cu}_3^+$ | + | $\text{C}_{10}\text{H}_8\text{N}_2^0$  | $\rightarrow$ | $[\text{Cu-C}_{10}\text{H}_8\text{N}_2]^+ + \text{Cu}_2^0$     | $\Delta E = 0.832 \text{ eV}$ (9)   |
| $\text{Cu}^+$   | + | $2\text{C}_{10}\text{H}_8\text{N}_2^0$ | $\rightarrow$ | $[\text{Cu-(C}_{10}\text{H}_8\text{N}_2)_2]^+$                 | $\Delta E = -5.264 \text{ eV}$ (10) |
| $\text{Cu}_2^+$ | + | $2\text{C}_{10}\text{H}_8\text{N}_2^0$ | $\rightarrow$ | $[\text{Cu-(C}_{10}\text{H}_8\text{N}_2)_2]^+ + \text{Cu}^0$   | $\Delta E = -2.971 \text{ eV}$ (11) |
| $\text{Cu}_3^+$ | + | $2\text{C}_{10}\text{H}_8\text{N}_2^0$ | $\rightarrow$ | $[\text{Cu-(C}_{10}\text{H}_8\text{N}_2)_2]^+ + \text{Cu}_2^0$ | $\Delta E = -1.698 \text{ eV}$ (12) |
| $\text{Ag}^+$   | + | $\text{C}_{10}\text{H}_8\text{N}_2^0$  | $\rightarrow$ | $\text{Ag}^0 + \text{C}_{10}\text{H}_8\text{N}_2^+$            | $\Delta E = 0.231 \text{ eV}$ (13)  |
| $\text{Cu}^+$   | + | $\text{C}_{10}\text{H}_8\text{N}_2^0$  | $\rightarrow$ | $\text{Cu}^0 + \text{C}_{10}\text{H}_8\text{N}_2^+$            | $\Delta E = -0.077 \text{ eV}$ (14) |
| $\text{Ar}^+$   | + | $\text{C}_{10}\text{H}_8\text{N}_2^0$  | $\rightarrow$ | $\text{Ar}^0 + \text{C}_{10}\text{H}_8\text{N}_2^+$            | $\Delta E = -7.482 \text{ eV}$ (15) |
| $\text{Ag}^0$   | + | $\text{C}_{10}\text{H}_8\text{N}_2^+$  | $\rightarrow$ | $[\text{Ag-C}_{10}\text{H}_8\text{N}_2]^+$                     | $\Delta E = -3.293 \text{ eV}$ (16) |
| $\text{Cu}^0$   | + | $\text{C}_{10}\text{H}_8\text{N}_2^+$  | $\rightarrow$ | $[\text{Cu-C}_{10}\text{H}_8\text{N}_2]^+$                     | $\Delta E = -2.656 \text{ eV}$ (17) |

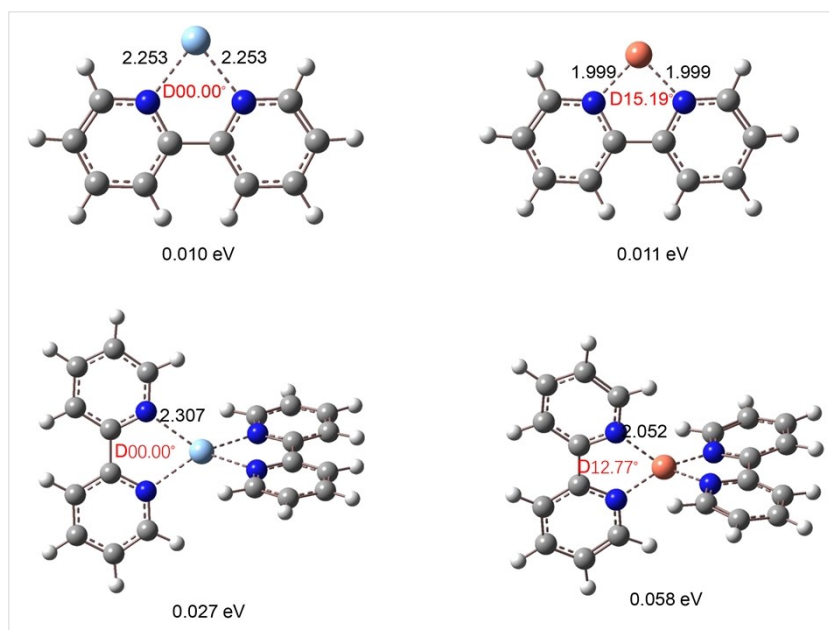

**Fig. S1** Structures and relative energies of  $[\text{Ag-bpy}_{1-2}]^+$  and  $[\text{Cu-bpy}_{1-2}]^+$  with numerical exchange of the N-C-C-N dihedral angles.

## S2. Charge distribution analysis

**Table S2** Positive charge distribution on metal part.

|                       | Mulliken | NPA   | Hirshfeld | ADCH  |
|-----------------------|----------|-------|-----------|-------|
| $[\text{Ag-bpy}]^+$   | 0.664    | 0.822 | 0.697     | 0.849 |
| $[\text{Ag-bpy}_2]^+$ | 0.624    | 0.633 | 0.536     | 0.619 |
| $[\text{Cu-bpy}]^+$   | 0.586    | 0.799 | 0.664     | 0.767 |
| $[\text{Cu-bpy}_2]^+$ | 0.520    | 0.568 | 0.525     | 0.475 |

### S3. Topological analysis

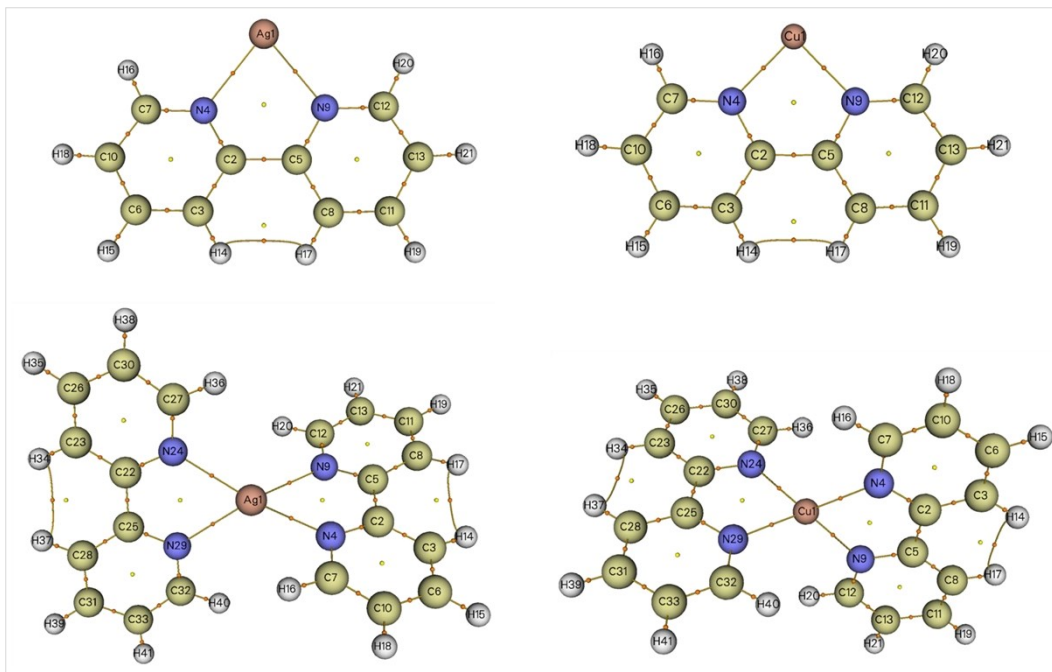

**Fig. S2** Topological analysis within the theory of atoms in molecules (AIM), the bond critical points (BCPs) are indicated by orange dots.

**Table S3** Energy density (H), electron density ( $\rho$ ), potential energy density (V), Lagrangian kinetic energy (G), Laplacian of electron density ( $\nabla^2\rho$ ), eta index ( $\eta$ ), and bond ellipticity ( $\epsilon$ ) of [M-bpy<sub>1-2</sub>]<sup>+</sup> (M=Ag, Cu).

| BCP     | $\rho$ (BCP) | V(BCP)  | G(BCP) | $\nabla^2\rho$ (BCP) | $\lambda_1$ | $\lambda_2$ | $\lambda_3$ | $\eta(r)= \lambda_1/\lambda_3$ | $\epsilon(r)= \lambda_1/\lambda_2 -1$ |
|---------|--------------|---------|--------|----------------------|-------------|-------------|-------------|--------------------------------|---------------------------------------|
| Ag1-N4  | 0.065        | -0.084  | 0.076  | 0.270                | -0.073      | -0.069      | 0.411       | 0.177                          | 0.058                                 |
| Ag1-N9  | 0.065        | -0.084  | 0.076  | 0.270                | -0.073      | -0.069      | 0.411       | 0.177                          | 0.058                                 |
| H14-H17 | 0.013        | -0.0077 | 0.010  | 0.050                | -0.012      | -0.0071     | 0.070       | 0.176                          | 0.690                                 |
| Ag1-N4  | 0.058        | -0.074  | 0.067  | 0.243                | -0.062      | -0.057      | 0.362       | 0.172                          | 0.088                                 |
| Ag1-N9  | 0.058        | -0.074  | 0.067  | 0.243                | -0.062      | -0.057      | 0.362       | 0.172                          | 0.088                                 |
| Ag1-N24 | 0.058        | -0.074  | 0.067  | 0.243                | -0.062      | -0.057      | 0.362       | 0.172                          | 0.088                                 |
| Ag1-N29 | 0.058        | -0.074  | 0.067  | 0.243                | -0.062      | -0.057      | 0.362       | 0.172                          | 0.088                                 |
| H14-H17 | 0.012        | -0.007  | 0.010  | 0.047                | -           | -0.0066     | 0.065       | 0.178                          | 0.773                                 |
|         |              |         |        |                      | 0.0117      |             |             |                                |                                       |
| H34-H37 | 0.0123       | -0.0072 | 0.0095 | 0.047                | -           | -0.0066     | 0.066       | 0.178                          | 0.773                                 |
|         |              |         |        |                      | 0.0117      |             |             |                                |                                       |
| Cu1-N4  | 0.088        | -0.138  | 0.127  | 0.464                | -0.117      | -0.112      | 0.693       | 0.169                          | 0.045                                 |
| Cu1-N9  | 0.088        | -0.138  | 0.127  | 0.464                | -0.117      | -0.112      | 0.693       | 0.169                          | 0.045                                 |
| H14-H17 | 0.128        | -0.742  | 0.974  | 0.483                | -0.013      | -0.008      | 0.070       | 0.190                          | 0.625                                 |
| Cu1-N4  | 0.076        | -0.115  | 0.110  | 0.416                | -0.096      | -0.088      | 0.599       | 0.160                          | 0.091                                 |
| Cu1-N9  | 0.076        | -0.115  | 0.110  | 0.416                | -0.096      | -0.088      | 0.599       | 0.160                          | 0.091                                 |
| Cu1-N24 | 0.076        | -0.115  | 0.110  | 0.416                | -0.096      | -0.088      | 0.599       | 0.160                          | 0.091                                 |
| Cu1-N29 | 0.076        | -0.115  | 0.110  | 0.416                | -0.096      | -0.088      | 0.599       | 0.160                          | 0.091                                 |
| H14-H17 | 0.012        | -0.0067 | 0.0088 | 0.044                | -           | -0.0064     | 0.062       | 0.185                          | 0.781                                 |
|         |              |         |        |                      | 0.0114      |             |             |                                |                                       |
| H34-H37 | 0.0116       | -0.0067 | 0.0088 | 0.044                | -           | -0.0064     | 0.0618      | 0.185                          | 0.781                                 |
|         |              |         |        |                      | 0.0114      |             |             |                                |                                       |

**Table S3-1** Detailed topological analysis of [Ag-bpy]<sup>+</sup>.

| BCP     | $\rho(\text{BCP})$ | $V(\text{BCP})$ | $G(\text{BCP})$ | $\nabla^2\rho(\text{BCP})$ | $\lambda_1$ | $\lambda_2$ | $\lambda_3$ | $\eta(\mathbf{r})= \lambda_1 /\lambda_3$ | $\varepsilon(\mathbf{r})= \lambda_1/\lambda_2 -1$ |
|---------|--------------------|-----------------|-----------------|----------------------------|-------------|-------------|-------------|------------------------------------------|---------------------------------------------------|
| Ag1-N4  | 0.065              | -0.084          | 0.076           | 0.270                      | -0.073      | -0.069      | 0.411       | 0.177                                    | 0.058                                             |
| Ag1-N9  | 0.065              | -0.084          | 0.076           | 0.270                      | -0.073      | -0.069      | 0.411       | 0.177                                    | 0.058                                             |
| C2-N4   | 0.331              | -0.744          | 0.263           | -0.875                     | -0.693      | -0.621      | 0.439       | 1.580                                    | 0.116                                             |
| C7-N4   | 0.332              | -0.791          | 0.298           | -0.786                     | -0.691      | -0.632      | 0.537       | 1.286                                    | 0.093                                             |
| C2-C3   | 0.310              | -0.423          | 0.103           | -0.871                     | -0.643      | -0.531      | 0.303       | 2.123                                    | 0.211                                             |
| C7-C10  | 0.316              | -0.436          | 0.105           | -0.909                     | -0.661      | -0.548      | 0.301       | 2.199                                    | 0.206                                             |
| C3-C6   | 0.313              | -0.430          | 0.103           | -0.894                     | -0.646      | -0.546      | 0.298       | 2.168                                    | 0.183                                             |
| C6-C10  | 0.314              | -0.431          | 0.103           | -0.901                     | -0.648      | -0.551      | 0.298       | 2.176                                    | 0.176                                             |
| C2-C5   | 0.264              | -0.289          | 0.061           | -0.668                     | -0.537      | -0.479      | 0.348       | 1.542                                    | 0.121                                             |
| C5-N9   | 0.331              | -0.744          | 0.263           | -0.875                     | -0.693      | -0.621      | 0.439       | 1.580                                    | 0.116                                             |
| C12-N9  | 0.332              | -0.791          | 0.298           | -0.786                     | -0.691      | -0.632      | 0.537       | 1.286                                    | 0.093                                             |
| C5-C8   | 0.310              | -0.423          | 0.103           | -0.871                     | -0.643      | -0.531      | 0.303       | 2.123                                    | 0.211                                             |
| C12-C13 | 0.316              | -0.436          | 0.105           | -0.909                     | -0.661      | -0.548      | 0.301       | 2.199                                    | 0.206                                             |
| C8-C11  | 0.313              | -0.430          | 0.103           | -0.894                     | -0.646      | -0.546      | 0.298       | 2.168                                    | 0.183                                             |
| C11-C13 | 0.314              | -0.431          | 0.103           | -0.901                     | -0.648      | -0.551      | 0.298       | 2.176                                    | 0.176                                             |
| H14-H17 | 0.013              | -0.0077         | 0.010           | 0.050                      | -0.012      | -0.0071     | 0.070       | 0.176                                    | 0.690                                             |

**Table S3-2** Detailed topological analysis of [Ag-bpy<sub>2</sub>]<sup>+</sup>.

| BCP    | $\rho(\text{BCP})$ | $V(\text{BCP})$ | $G(\text{BCP})$ | $\nabla^2\rho(\text{BCP})$ | $\lambda_1$ | $\lambda_2$ | $\lambda_3$ | $\eta(\mathbf{r})= \lambda_1 /\lambda_3$ | $\varepsilon(\mathbf{r})= \lambda_1/\lambda_2 -1$ |
|--------|--------------------|-----------------|-----------------|----------------------------|-------------|-------------|-------------|------------------------------------------|---------------------------------------------------|
| Ag1-N4 | 0.058              | -0.074          | 0.067           | 0.243                      | -0.062      | -0.057      | 0.362       | 0.172                                    | 0.088                                             |
| Ag1-N9 | 0.058              | -0.074          | 0.067           | 0.243                      | -0.062      | -0.057      | 0.362       | 0.172                                    | 0.088                                             |
| C2-N4  | 0.335              | -0.750          | 0.262           | -0.902                     | -0.704      | -0.633      | 0.435       | 1.620                                    | 0.112                                             |
| C7-N4  | 0.336              | -0.792          | 0.293           | -0.826                     | -0.703      | -0.641      | 0.518       | 1.357                                    | 0.097                                             |
| C2-C3  | 0.309              | -0.421          | 0.102           | -0.868                     | -0.642      | -0.531      | 0.305       | 2.106                                    | 0.209                                             |
| C7-C10 | 0.315              | -0.434          | 0.104           | -0.902                     | -0.659      | -0.545      | 0.302       | 2.180                                    | 0.209                                             |
| C3-C6  | 0.313              | -0.430          | 0.104           | -0.892                     | -0.646      | -0.543      | 0.298       | 2.172                                    | 0.190                                             |
| C6-C10 | 0.313              | -0.429          | 0.103           | -0.894                     | -0.646      | -0.547      | 0.298       | 2.167                                    | 0.181                                             |
| C2-C5  | 0.267              | -0.295          | 0.062           | -0.684                     | -0.546      | -0.487      | 0.349       | 1.565                                    | 0.121                                             |
| C5-N9  | 0.335              | -0.750          | 0.262           | -0.902                     | -0.704      | -0.633      | 0.435       | 1.620                                    | 0.112                                             |

|         |        |         |        |        |         |         |       |       |       |
|---------|--------|---------|--------|--------|---------|---------|-------|-------|-------|
| C12-N9  | 0.336  | -0.792  | 0.293  | -0.826 | -0.703  | -0.641  | 0.518 | 1.357 | 0.097 |
| C5-C8   | 0.309  | -0.421  | 0.102  | -0.868 | -0.642  | -0.531  | 0.305 | 2.106 | 0.209 |
| C12-C13 | 0.315  | -0.434  | 0.104  | -0.902 | -0.659  | -0.545  | 0.302 | 2.180 | 0.209 |
| C8-C11  | 0.313  | -0.430  | 0.104  | -0.892 | -0.646  | -0.543  | 0.298 | 2.172 | 0.190 |
| C11-C13 | 0.313  | -0.429  | 0.103  | -0.894 | -0.646  | -0.547  | 0.298 | 2.166 | 0.181 |
| H14-H17 | 0.012  | -0.007  | 0.010  | 0.047  | -0.0117 | -0.0066 | 0.065 | 0.178 | 0.773 |
| Ag1-N24 | 0.058  | -0.074  | 0.067  | 0.243  | -0.062  | -0.057  | 0.362 | 0.172 | 0.088 |
| Ag1-N29 | 0.058  | -0.074  | 0.067  | 0.243  | -0.062  | -0.057  | 0.362 | 0.172 | 0.088 |
| C22-N24 | 0.335  | -0.750  | 0.262  | -0.902 | -0.704  | -0.633  | 0.435 | 1.620 | 0.112 |
| C27-N24 | 0.336  | -0.792  | 0.293  | -0.826 | -0.703  | -0.641  | 0.518 | 1.357 | 0.097 |
| C22-C23 | 0.309  | -0.421  | 0.101  | -0.868 | -0.642  | -0.531  | 0.305 | 2.106 | 0.209 |
| C27-C30 | 0.315  | -0.434  | 0.104  | -0.902 | -0.659  | -0.545  | 0.302 | 2.180 | 0.209 |
| C23-C26 | 0.313  | -0.430  | 0.104  | -0.892 | -0.646  | -0.543  | 0.298 | 2.172 | 0.190 |
| C26-C30 | 0.313  | -0.429  | 0.103  | -0.894 | -0.646  | -0.547  | 0.298 | 2.166 | 0.181 |
| C22-C25 | 0.267  | -0.295  | 0.062  | -0.684 | -0.546  | -0.487  | 0.349 | 1.565 | 0.121 |
| C25-N29 | 0.335  | -0.750  | 0.262  | -0.902 | -0.704  | -0.633  | 0.435 | 1.620 | 0.112 |
| C32-N29 | 0.336  | -0.792  | 0.293  | -0.826 | -0.703  | -0.641  | 0.518 | 1.357 | 0.097 |
| C25-C28 | 0.309  | -0.421  | 0.102  | -0.868 | -0.642  | -0.531  | 0.305 | 2.106 | 0.209 |
| C32-C33 | 0.315  | -0.434  | 0.104  | -0.902 | -0.659  | -0.545  | 0.302 | 2.180 | 0.209 |
| C28-C31 | 0.313  | -0.430  | 0.104  | -0.892 | -0.646  | -0.543  | 0.298 | 2.172 | 0.190 |
| C31-C33 | 0.313  | -0.429  | 0.103  | -0.894 | -0.646  | -0.547  | 0.298 | 2.166 | 0.181 |
| H34-H37 | 0.0123 | -0.0072 | 0.0095 | 0.047  | -0.0117 | -0.0066 | 0.066 | 0.178 | 0.773 |

**Table S3-3** Detailed topological analysis of [Cu-bpy]<sup>+</sup>.

| BCP    | $\rho(\text{BCP})$ | $V(\text{BCP})$ | $G(\text{BCP})$ | $\nabla^2\rho(\text{BCP})$ | $\lambda_1$ | $\lambda_2$ | $\lambda_3$ | $\eta(\mathbf{r})=[\lambda_1/\lambda_3]$ | $\varepsilon(\mathbf{r})=[\lambda_1/\lambda_2]-1$ |
|--------|--------------------|-----------------|-----------------|----------------------------|-------------|-------------|-------------|------------------------------------------|---------------------------------------------------|
| Cu1-N4 | 0.088              | -0.138          | 0.127           | 0.464                      | -0.117      | -0.112      | 0.693       | 0.169                                    | 0.045                                             |
| Cu1-N9 | 0.088              | -0.138          | 0.127           | 0.464                      | -0.117      | -0.112      | 0.693       | 0.169                                    | 0.045                                             |
| C2-N4  | 0.328              | -0.727          | 0.255           | -0.873                     | -0.683      | -0.610      | 0.420       | 1.626                                    | 0.120                                             |
| C7-N4  | 0.331              | -0.794          | 0.301           | -0.766                     | -0.687      | -0.630      | 0.551       | 1.247                                    | 0.090                                             |
| C2-C3  | 0.311              | -0.428          | 0.104           | -0.880                     | -0.647      | -0.533      | 0.300       | 2.153                                    | 0.214                                             |
| C7-C10 | 0.316              | -0.437          | 0.105           | -0.911                     | -0.662      | -0.549      | 0.300       | 2.207                                    | 0.206                                             |



|         |       |        |       |        |        |        |       |       |       |
|---------|-------|--------|-------|--------|--------|--------|-------|-------|-------|
| C3-C6   | 0.312 | -0.428 | 0.103 | -0.891 | -0.644 | -0.545 | 0.299 | 2.157 | 0.182 |
| C6-C10  | 0.314 | -0.432 | 0.103 | -0.902 | -0.648 | -0.551 | 0.298 | 2.179 | 0.176 |
| C2-C5   | 0.264 | -0.288 | 0.610 | -0.664 | -0.535 | -0.476 | 0.347 | 1.543 | 0.124 |
| C5-N9   | 0.328 | -0.727 | 0.255 | -0.873 | -0.683 | -0.610 | 0.420 | 1.626 | 0.120 |
| C12-N9  | 0.331 | -0.794 | 0.301 | -0.766 | -0.687 | -0.630 | 0.551 | 1.247 | 0.090 |
| C5-C8   | 0.311 | -0.428 | 0.104 | -0.880 | -0.647 | -0.533 | 0.300 | 2.153 | 0.214 |
| C12-C13 | 0.316 | -0.437 | 0.105 | -0.911 | -0.662 | -0.549 | 0.300 | 2.207 | 0.206 |
| C8-C11  | 0.312 | -0.428 | 0.103 | -0.891 | -0.644 | -0.545 | 0.299 | 2.157 | 0.182 |
| C11-C13 | 0.314 | -0.432 | 0.103 | -0.902 | -0.648 | -0.551 | 0.298 | 2.179 | 0.176 |
| H14-H17 | 0.128 | -0.742 | 0.974 | 0.483  | -0.013 | -0.008 | 0.070 | 0.190 | 0.625 |

**Table S3-4** Detailed topological analysis of [Cu-bpy<sub>2</sub>]<sup>+</sup>.

| BCP     | $\rho(\text{BCP})$ | $V(\text{BCP})$ | $G(\text{BCP})$ | $\nabla^2\rho(\text{BCP})$ | $\lambda_1$ | $\lambda_2$ | $\lambda_3$ | $\eta(\mathbf{r})= \lambda_1/\lambda_3 $ | $\varepsilon(\mathbf{r})= \lambda_1/\lambda_2 -1$ |
|---------|--------------------|-----------------|-----------------|----------------------------|-------------|-------------|-------------|------------------------------------------|---------------------------------------------------|
| Cu1-N4  | 0.076              | -0.115          | 0.110           | 0.416                      | -0.096      | -0.088      | 0.599       | 0.160                                    | 0.091                                             |
| Cu1-N9  | 0.076              | -0.115          | 0.110           | 0.416                      | -0.096      | -0.088      | 0.599       | 0.160                                    | 0.091                                             |
| C2-N4   | 0.332              | -0.736          | 0.256           | -0.898                     | -0.696      | -0.624      | 0.421       | 1.652                                    | 0.115                                             |
| C7-N4   | 0.334              | -0.789          | 0.292           | -0.816                     | -0.699      | -0.637      | 0.520       | 1.345                                    | 0.097                                             |
| C2-C3   | 0.310              | -0.423          | 0.102           | -0.874                     | -0.644      | -0.533      | 0.303       | 2.127                                    | 0.208                                             |
| C7-C10  | 0.315              | -0.435          | 0.104           | -0.905                     | -0.660      | -0.545      | 0.301       | 2.192                                    | 0.211                                             |
| C3-C6   | 0.313              | -0.430          | 0.104           | -0.890                     | -0.646      | -0.542      | 0.297       | 2.171                                    | 0.192                                             |
| C6-C10  | 0.312              | -0.428          | 0.102           | -0.891                     | -0.644      | -0.546      | 0.298       | 2.158                                    | 0.179                                             |
| C2-C5   | 0.270              | -0.302          | 0.064           | -0.697                     | -0.554      | -0.490      | 0.347       | 1.596                                    | 0.131                                             |
| C5-N9   | 0.332              | -0.736          | 0.256           | -0.898                     | -0.696      | -0.624      | 0.421       | 1.652                                    | 0.115                                             |
| C12-N9  | 0.334              | -0.789          | 0.292           | -0.816                     | -0.699      | -0.637      | 0.520       | 1.345                                    | 0.097                                             |
| C5-C8   | 0.310              | -0.423          | 0.102           | -0.874                     | -0.644      | -0.533      | 0.303       | 2.127                                    | 0.208                                             |
| C12-C13 | 0.315              | -0.435          | 0.104           | -0.905                     | -0.660      | -0.545      | 0.301       | 2.192                                    | 0.211                                             |
| C8-C11  | 0.313              | -0.430          | 0.104           | -0.890                     | -0.646      | -0.542      | 0.297       | 2.171                                    | 0.192                                             |
| C11-C13 | 0.312              | -0.428          | 0.102           | -0.891                     | -0.644      | -0.546      | 0.298       | 2.158                                    | 0.179                                             |
| H14-H17 | 0.012              | -0.0067         | 0.0088          | 0.044                      | -0.0114     | -0.0064     | 0.062       | 0.185                                    | 0.781                                             |
| Cu1-N24 | 0.076              | -0.115          | 0.110           | 0.416                      | -0.096      | -0.088      | 0.599       | 0.160                                    | 0.091                                             |
| Cu1-N29 | 0.076              | -0.115          | 0.110           | 0.416                      | -0.096      | -0.088      | 0.599       | 0.160                                    | 0.091                                             |

|         |        |         |        |        |         |         |        |       |       |
|---------|--------|---------|--------|--------|---------|---------|--------|-------|-------|
| C22-N24 | 0.331  | -0.736  | 0.256  | -0.898 | -0.696  | -0.624  | 0.421  | 1.652 | 0.115 |
| C27-N24 | 0.334  | -0.789  | 0.292  | -0.816 | -0.699  | -0.637  | 0.520  | 1.345 | 0.097 |
| C22-C23 | 0.310  | -0.423  | 0.102  | -0.874 | -0.644  | -0.533  | 0.303  | 2.127 | 0.208 |
| C27-C30 | 0.315  | -0.435  | 0.104  | -0.905 | -0.660  | -0.545  | 0.301  | 2.192 | 0.211 |
| C23-C26 | 0.313  | -0.430  | 0.104  | -0.890 | -0.646  | -0.542  | 0.297  | 2.171 | 0.192 |
| C26-C30 | 0.312  | -0.428  | 0.102  | -0.891 | -0.644  | -0.546  | 0.298  | 2.158 | 0.179 |
| C22-C25 | 0.270  | -0.302  | 0.064  | -0.697 | -0.554  | -0.490  | 0.347  | 1.596 | 0.131 |
| C25-N29 | 0.332  | -0.736  | 0.256  | -0.898 | -0.696  | -0.624  | 0.421  | 1.652 | 0.115 |
| C32-N29 | 0.334  | -0.789  | 0.292  | -0.816 | -0.699  | -0.637  | 0.520  | 1.345 | 0.097 |
| C25-C28 | 0.310  | -0.423  | 0.102  | -0.874 | -0.644  | -0.533  | 0.303  | 2.127 | 0.208 |
| C32-C33 | 0.315  | -0.435  | 0.104  | -0.905 | -0.660  | -0.545  | 0.301  | 2.192 | 0.211 |
| C28-C31 | 0.313  | -0.430  | 0.104  | -0.890 | -0.646  | -0.542  | 0.297  | 2.171 | 0.192 |
| C31-C33 | 0.312  | -0.428  | 0.102  | -0.891 | -0.644  | -0.546  | 0.298  | 2.158 | 0.179 |
| H34-H37 | 0.0116 | -0.0067 | 0.0088 | 0.044  | -0.0114 | -0.0064 | 0.0618 | 0.185 | 0.781 |

---
